# Supplementary material for: Metabolomics combined with transcriptomics and physiology reveals the regulatory responses of soybean plants to drought stress
Source: Front Genet. 2024 Oct 24;15:1458656. doi: 10.3389/fgene.2024.1458656 (PMC11541050; doi:10.3389/fgene.2024.1458656)
Supplement: Supplementary file 4 [file Table3.xls]

## Sheet: LDCK-vs-LD.path (2)
KEGG_A_class	KEGG_B_class	Pathway	Gene_MDCK-vs-MD (741)	Gene_All (11039)	Gene_Pvalue	Gene_Qvalue	Metabolite_MDCK-vs-MD (35)	Metabolite_All (222)	Metabolite_Pvalue	Metabolite_Qvalue	Pathway ID	Genes	K_IDs	Metabolites	C_IDs
Metabolism	Global and overview maps	Biosynthesis of secondary metabolites	291	2899	7.53e-16	8.88e-14	14	78	0.317852	0.502411	ko01110	Glyma.01G007200(HXK1);Glyma.01G031500(ALDH2B7);Glyma.01G054500(CM1);Glyma.01G062400(At1g31672);Glyma.01G105200(GA2OX1);Glyma.01G129400(AGT3);Glyma.01G134600(G4DT);Glyma.01G160000(SAT4);Glyma.01G163100(PER64);Glyma.01G169200(CYP84A1);Glyma.01G194700(NAGS2);Glyma.01G203400(BAM3);Glyma.01G211000(INVA);Glyma.01G215500(HMGS);Glyma.01G228700(CHS7);Glyma.02G048400(FHT);Glyma.02G057400(SDH1-1);Glyma.02G0…	K00844+K00128+K01850+K00276+K04125+K00827+K09833+K00640+K00430+K09755+K14682+K01177+K01193+K01641+K00660+K00475+K00234+K13789+K14595+K14595+K00276+K14674+K05349+K01953+K13508+K00966+K00430+K01640+K10775+K15095+K15095+K13508+K01760+K14674+K13261+K00430+K00873+K00700+K01648+K00975+K00700+K01610+K01087+K01834+K00422+K00891+K00430+K18857+K00166+K05933+K00600+K00873+K05280+K01904+K04125+K00588+K00083+…	pme0006;pmb1096;mws0258;mws0001;HX1366;pme0026;pme0014;mws0254;pme0021;MWSmce119;mws0250;pme3261;Lmdp003110;MWSmce024	C00148+C00463+C00407+C00152+C05851+C00047+C00025+C00135+C00079+C00062+C00082+C14314+C16233+C01527
Metabolism	Global and overview maps	Metabolic pathways	440	5150	4.34e-13	2.56e-11	18	124	0.776887	0.776887	ko01100	Glyma.01G007200(HXK1);Glyma.01G008500(MODA);Glyma.01G031500(ALDH2B7);Glyma.01G054500(CM1);Glyma.01G062400(At1g31672);Glyma.01G106100(HSP26-A);Glyma.01G113000(SQD2);Glyma.01G129400(AGT3);Glyma.01G134600(G4DT);Glyma.01G148700(ASHR2);Glyma.01G160000(SAT4);Glyma.01G163100(PER64);Glyma.01G169200(CYP84A1);Glyma.01G194700(NAGS2);Glyma.01G203400(BAM3);Glyma.01G210800(APT3);Glyma.01G211000(INVA);Glyma.01G…	K00844+K00029+K00128+K01850+K00276+K00799+K06119+K00827+K09833+K11426+K00640+K00430+K09755+K14682+K01177+K00759+K01193+K01641+K00660+K01897+K00799+K20547+K00475+K00234+K13789+K14595+K14595+K11147+K00276+K01184+K14674+K00434+K05349+K01953+K17839+K01915+K13508+K00966+K05857+K00430+K01640+K01464+K00799+K10775+K06119+K13508+K01209+K01760+K14674+K06118+K06617+K00512+K00430+K00799+K00889+K00873+K00700+…	pme3011;mws0576;pme0006;pmb1096;Zmdp000376;mws0258;mws0001;pme0193;pme0026;pme0014;mws0254;pme0021;MWSmce119;mws0250;pmb1754;mws0018;pma3101;pme0230	C00334+C01089+C00148+C00463+C02647+C00407+C00152+C00064+C00047+C00025+C00135+C00079+C00062+C00082+C00588+C00750+C05841+C00212
Metabolism	Biosynthesis of other secondary metabolites	Phenylpropanoid biosynthesis	57	436	7.8e-07	3.07e-05	4	8	0.0229877	0.117853	ko00940	Glyma.01G163100(PER64);Glyma.01G169200(CYP84A1);Glyma.02G225000(BACOVA_02659);Glyma.02G259300(GSVIVT00023967001);Glyma.02G309300(PAL17.1);Glyma.03G032800(GT5);Glyma.03G145600(pod);Glyma.04G220600(PER52);Glyma.05G075100(4CLL9);Glyma.05G147000(FAOMT);Glyma.05G187700(CAD1);Glyma.06G137100(COMT1);Glyma.06G145300(PER52);Glyma.07G048800(COMT);Glyma.07G048900(COMT1);Glyma.07G100500(BGLU44);Glyma.07G1627…	K00430+K09755+K05349+K00430+K10775+K12356+K00430+K00430+K01904+K00588+K00083+K13066+K00430+K13066+K13066+K05350+K05349+K05350+K00430+K12355+K00430+K00430+K13065+K00430+K12355+K00430+K00430+K13066+K13066+K00430+K00430+K00430+K00430+K09755+K01188+K01188+K00430+K00430+K00430+K00487+K00083+K00430+K05350+K00430+K00430+K00430+K09755+K00430+K00430+K00430+K00430+K00430+K00430+K13066+K13066+K13065+K00430	HX1366;pme0021;mws0250;MWSmce024	C05851+C00079+C00082+C01527
Metabolism	Biosynthesis of other secondary metabolites	Isoflavonoid biosynthesis	12	56	0.000275117	0.00325	8	20	0.00541169	0.0767394	ko00943	Glyma.03G143700(CYP93A1);Glyma.08G089400(CYP81E9);Glyma.09G048700(CYP81E1);Glyma.09G049100(CYP81E7);Glyma.09G094400(D7OMT);Glyma.09G269500(BEN1);Glyma.09G269600(BEN1);Glyma.16G149300(CYP81E8);Glyma.16G175500(GmIF7GT1);Glyma.19G030500(PMAT1);Glyma.19G144700(CYP93A2);Glyma.19G146800(CYP93A1)	K13261+K22932+K13260+K13260+K13262+K13265+K13265+K13260+K13263+K13264+K13261+K13261	pme3261;Lmdp003110;MWSHY0039;MWSHY0179;MWSHY0180;pmp000193;pmp000194;pmp000195	C14314+C16233+C10216+C10509+C16195+C16191+C16192+C16197
Metabolism	Carbohydrate metabolism	Ascorbate and aldarate metabolism	18	109	0.000318099	0.00341	1	7	0.704496	0.734475	ko00053	Glyma.01G031500(ALDH2B7);Glyma.02G209000(CLEB3J9);Glyma.05G002500(GLCAK1);Glyma.07G013900(MIOX1);Glyma.07G050900(GULLO6);Glyma.07G126600(MIOX2);Glyma.07G266200(VTC4);Glyma.09G011100(VTC4);Glyma.10G291100(DHAR2);Glyma.11G216400(DHAR3);Glyma.13G057700(UGD1);Glyma.13G170600(ALDH2B7);Glyma.15G034400(ALDH3F1);Glyma.15G115500(VTC4);Glyma.16G019900(GULLO6);Glyma.18G040100(DHAR3);Glyma.19G028500(UGD1);Gl…	K00128+K00434+K16190+K00469+K00103+K00469+K10047+K10047+K21888+K21888+K00012+K00128+K00128+K10047+K00103+K21888+K00012+K00423	Lmbn000198	C03064
Metabolism	Metabolism of other amino acids	Glutathione metabolism	28	213	0.000469305	0.00426	2	7	0.304505	0.497358	ko00480	Glyma.01G106100(HSP26-A);Glyma.02G024600(GSTU18);Glyma.02G209000(CLEB3J9);Glyma.02G283900(GSTF9);Glyma.03G176300(GSTL3);Glyma.04G107600(HSP26-A);Glyma.06G078400(GGCT2;2);Glyma.06G099000(HSP26-A);Glyma.07G139700(HSP26-A);Glyma.07G139800(HSP26-A);Glyma.07G140000(HSP26-A);Glyma.07G140200(HSP26-A);Glyma.08G013900(GPX8);Glyma.08G118700(HSP26-A);Glyma.08G175200(PARC);Glyma.10G047700(GSTL3);Glyma.10G192…	K00799+K00799+K00434+K00799+K00799+K00799+K22596+K00799+K00799+K00799+K00799+K00799+K00432+K00799+K00799+K00799+K00799+K21888+K00432+K21888+K18592+K00799+K00799+K00799+K10808+K00797+K21888+K00797	pme0014;mws0018	C00025+C00750
Environmental Information Processing	Membrane transport	ABC transporters	14	87	0.00184455	0.0155	8	22	0.0107499	0.0877907	ko02010	Glyma.01G016500(ABCB2);Glyma.03G101000(ABCC9);Glyma.03G224100(ABCB11);Glyma.06G269300(Os02g0190300);Glyma.08G270300(ABCB2);Glyma.08G326400(--);Glyma.09G206300(ABCB2);Glyma.10G055000(ABCB1);Glyma.12G135300(Os02g0190300);Glyma.13G118800(ABCB11);Glyma.13G118900(ABCB11);Glyma.13G119000(ABCB11);Glyma.16G172600(ABCC10);Glyma.18G080900(ABCC3)	K05658+K05665+K05658+K05658+K05658+K05666+K05658+K05658+K05658+K05658+K05658+K05658+K05666+K05666	pme0006;mws0258;pme0193;pme0026;pme0014;mws0254;pme0021;MWSmce119	C00148+C00407+C00064+C00047+C00025+C00135+C00079+C00062
Metabolism	Biosynthesis of other secondary metabolites	Isoquinoline alkaloid biosynthesis	10	64	0.00974956	0.064	1	4	0.499122	0.660999	ko00950	Glyma.01G062400(At1g31672);Glyma.02G120600(At1g31672);Glyma.04G121700(AS1);Glyma.06G270400(AS1);Glyma.07G059000(TYDC1);Glyma.07G193400(PPO);Glyma.07G193500(PPO);Glyma.12G205900(NAAT1);Glyma.13G183200(AS1);Glyma.15G071200(AS1)	K00276+K00276+K00422+K00422+K01593+K00422+K00422+K00815+K00422+K00422	mws0250	C00082
Metabolism	Amino acid metabolism	Tyrosine metabolism	15	123	0.017578	0.104	1	6	0.647355	0.720918	ko00350	Glyma.01G062400(At1g31672);Glyma.02G120600(At1g31672);Glyma.04G121700(AS1);Glyma.04G240800(ADH1);Glyma.06G122600(ADH1);Glyma.06G270400(AS1);Glyma.07G059000(TYDC1);Glyma.07G149400(At1g32780);Glyma.07G193400(PPO);Glyma.07G193500(PPO);Glyma.12G015300(8HGO);Glyma.12G205900(NAAT1);Glyma.13G183200(AS1);Glyma.14G042000(At5g42250);Glyma.15G071200(AS1)	K00276+K00276+K00422+K18857+K18857+K00422+K01593+K00001+K00422+K00422+K00121+K00815+K00422+K00121+K00422	mws0250	C00082
Metabolism	Metabolism of other amino acids	Cyanoamino acid metabolism	13	114	0.0417263	0.197	4	8	0.0229877	0.117853	ko00460	Glyma.02G225000(BACOVA_02659);Glyma.04G254300(SHM7);Glyma.06G043000(At3g16150);Glyma.06G107800(SHM7);Glyma.07G100500(BGLU44);Glyma.07G162700(--);Glyma.07G258700(BGLU46);Glyma.11G129200(BGLU12);Glyma.11G129800(BGLU12);Glyma.11G197300(CYP79D4);Glyma.11G235800(GGT2);Glyma.15G105900(GPT2);Glyma.17G238200(At3g16150)	K05349+K00600+K13051+K00600+K05350+K05349+K05350+K01188+K01188+K12153+K18592+K05350+K13051	mws0258;mws0001;pme0021;mws0250	C00407+C00152+C00079+C00082
Metabolism	Lipid metabolism	Glycerophospholipid metabolism	22	227	0.0522309	0.228	1	5	0.579538	0.690866	ko00564	Glyma.02G190000(SDP1);Glyma.02G249300(GPAT5);Glyma.03G078600(GPAT6);Glyma.03G130900(SDP1);Glyma.05G020500(GDPD5);Glyma.06G169100(NPC6);Glyma.08G126700(PLDDELTA);Glyma.11G178400(NPC1);Glyma.12G146700(DGK5);Glyma.13G085700(GPAT2);Glyma.14G067200(GPAT5);Glyma.15G008500(PLD1);Glyma.15G010800(--);Glyma.16G052000(GDPD1);Glyma.16G081200(NPC4);Glyma.17G242900(PAH2);Glyma.18G064000(NPC1);Glyma.18G244500(L…	K14674+K13508+K13508+K14674+K01126+K01114+K01115+K01114+K00901+K13508+K13508+K01115+K06130+K18696+K01114+K15728+K01114+K22389+K18696+K13508+K14156+K01115	pmb1754	C00588
Metabolism	Metabolism of cofactors and vitamins	Thiamine metabolism	7	52	0.0574646	0.242	1	5	0.579538	0.690866	ko00730	Glyma.06G269700(THI1-1);Glyma.08G277000(Os07g0190000);Glyma.08G277100(Os07g0190000);Glyma.09G200500(Os07g0190000);Glyma.13G213500(TKT2);Glyma.14G135000(TKT2);Glyma.20G142000(THI1-2)	K03146+K01662+K01662+K01662+K01662+K01662+K03146	mws0250	C00082
Metabolism	Amino acid metabolism	Alanine, aspartate and glutamate metabolism	13	126	0.0799131	0.286	4	6	0.00626444	0.0767394	ko00250	Glyma.01G129400(AGT3);Glyma.02G228100(AS2);Glyma.02G244000(Gln-gamma);Glyma.05G007600(AO);Glyma.05G029100(FIS1);Glyma.05G029200(FIS1);Glyma.06G043000(At3g16150);Glyma.06G127400(GLT1);Glyma.11G170300(AS2);Glyma.11G171400(AS2);Glyma.14G195000(AS1);Glyma.17G238200(At3g16150);Glyma.18G210500(At3g08860)	K00827+K01953+K01915+K00278+K00294+K00294+K13051+K00264+K01953+K01953+K01953+K13051+K00827	pme3011;mws0001;pme0193;pme0014	C00334+C00152+C00064+C00025
Metabolism	Metabolism of cofactors and vitamins	Ubiquinone and other terpenoid-quinone biosynthesis	13	130	0.0964231	0.325	1	2	0.29106	0.497358	ko00130	Glyma.01G134600(G4DT);Glyma.05G075100(4CLL9);Glyma.10G070200(G4DT);Glyma.11G210300(G4DT);Glyma.11G210400(G4DT);Glyma.12G045300(At4g36750);Glyma.12G141900(FQR1);Glyma.12G205900(NAAT1);Glyma.13G097800(HPT1);Glyma.13G249700(At4g27270);Glyma.14G205200(CYP73A11);Glyma.17G061900(HPT1);Glyma.20G245100(G4DT)	K09833+K01904+K09833+K09833+K09833+K03809+K03809+K00815+K09833+K03809+K00487+K09833+K09833	mws0250	C00082
Metabolism	Amino acid metabolism	Phenylalanine metabolism	8	75	0.128931	0.383	3	7	0.0803338	0.23155	ko00360	Glyma.01G062400(At1g31672);Glyma.02G120600(At1g31672);Glyma.02G309300(PAL17.1);Glyma.06G254700(hbdA);Glyma.07G059000(TYDC1);Glyma.08G106100(At4g34880);Glyma.08G106200(At4g34880);Glyma.12G205900(NAAT1)	K00276+K00276+K10775+K00074+K01593+K01426+K01426+K00815	Lmgp000659;pme0021;mws0250	C02505+C00079+C00082
Metabolism	Biosynthesis of other secondary metabolites	Tropane, piperidine and pyridine alkaloid biosynthesis	6	61	0.224212	0.54	3	8	0.114741	0.295912	ko00960	Glyma.01G062400(At1g31672);Glyma.02G120600(At1g31672);Glyma.07G136000(At5g06060);Glyma.07G136200(At5g06060);Glyma.12G205900(NAAT1);Glyma.18G035100(At5g06060)	K00276+K00276+K08081+K08081+K00815+K08081	mws0258;pme0026;pme0021	C00407+C00047+C00079
Metabolism	Amino acid metabolism	Arginine and proline metabolism	12	141	0.237353	0.56	6	18	0.0443889	0.155361	ko00330	Glyma.01G031500(ALDH2B7);Glyma.02G240000(PAO5);Glyma.05G029100(FIS1);Glyma.05G029200(FIS1);Glyma.08G106100(At4g34880);Glyma.08G106200(At4g34880);Glyma.13G153100(PAO4);Glyma.13G170600(ALDH2B7);Glyma.15G034400(ALDH3F1);Glyma.17G092400(SPDSYN);Glyma.18G137100(SPDSYN2);Glyma.19G043000(POX2)	K00128+K17839+K00294+K00294+K01426+K01426+K17839+K00128+K00128+K00797+K00797+K00318	pme3011;pme0006;Zmdp000376;pme0014;MWSmce119;mws0018	C00334+C00148+C02647+C00025+C00062+C00750
Metabolism	Energy metabolism	Nitrogen metabolism	7	80	0.289753	0.619	2	2	0.024255	0.117853	ko00910	Glyma.02G244000(Gln-gamma);Glyma.06G127400(GLT1);Glyma.06G182700(BCA2);Glyma.08G284000(NRT2.5);Glyma.10G059400(ACA7);Glyma.15G057700(BCA5);Glyma.18G138400(BCA2)	K01915+K00264+K01673+K02575+K01674+K01673+K01673	pme0193;pme0014	C00064+C00025
Metabolism	Amino acid metabolism	Tryptophan metabolism	9	107	0.29048	0.619	2	12	0.592171	0.690866	ko00380	Glyma.01G031500(ALDH2B7);Glyma.07G059000(TYDC1);Glyma.08G106100(At4g34880);Glyma.08G106200(At4g34880);Glyma.11G051800(CYP81E8);Glyma.13G048500(DAO);Glyma.13G170600(ALDH2B7);Glyma.15G034400(ALDH3F1);Glyma.20G018600(CYP89A9)	K00128+K01593+K01426+K01426+K07408+K23947+K00128+K00128+K07408	pmb1096;pmb0818	C00463+C05660
Metabolism	Lipid metabolism	Synthesis and degradation of ketone bodies	2	16	0.292268	0.619	1	1	0.157658	0.367868	ko00072	Glyma.01G215500(HMGS);Glyma.02G277900(HMGCL)	K01641+K01640	mws0576	C01089
Metabolism	Metabolism of cofactors and vitamins	Nicotinate and nicotinamide metabolism	5	59	0.363019	0.739	3	11	0.241628	0.493324	ko00760	Glyma.03G193800(URH1);Glyma.03G225500(--);Glyma.05G007600(AO);Glyma.10G139400(--);Glyma.19G193700(URH1)	K01240+K18551+K00278+K18551+K01240	pme3011;pme2268;pma3101	C00334+C01004+C05841
Metabolism	Metabolism of other amino acids	beta-Alanine metabolism	8	108	0.439807	0.861	3	6	0.0514593	0.1681	ko00410	Glyma.01G031500(ALDH2B7);Glyma.01G062400(At1g31672);Glyma.02G120600(At1g31672);Glyma.02G240000(PAO5);Glyma.02G278600(PYD2);Glyma.13G153100(PAO4);Glyma.13G170600(ALDH2B7);Glyma.15G034400(ALDH3F1)	K00128+K00276+K00276+K17839+K01464+K17839+K00128+K00128	pme3011;mws0254;mws0018	C00334+C00135+C00750
Metabolism	Amino acid metabolism	Phenylalanine, tyrosine and tryptophan biosynthesis	7	94	0.445186	0.861	3	5	0.0288619	0.117853	ko00400	Glyma.01G054500(CM1);Glyma.04G219200(SK);Glyma.11G003500(TSB);Glyma.11G233900(TYRAAT1);Glyma.12G205900(NAAT1);Glyma.13G059400(CM1);Glyma.18G028900(ASA1)	K01850+K00891+K01696+K15227+K00815+K01850+K01657	pmb1096;pme0021;mws0250	C00463+C00079+C00082
Metabolism	Amino acid metabolism	Valine, leucine and isoleucine degradation	8	110	0.460468	0.862	1	4	0.499122	0.660999	ko00280	Glyma.01G031500(ALDH2B7);Glyma.01G129400(AGT3);Glyma.01G215500(HMGS);Glyma.02G277900(HMGCL);Glyma.04G243000(At5g09300);Glyma.13G170600(ALDH2B7);Glyma.15G034400(ALDH3F1);Glyma.18G210500(At3g08860)	K00128+K00827+K01641+K01640+K00166+K00128+K00128+K00827	mws0258	C00407
Metabolism	Amino acid metabolism	Lysine degradation	6	81	0.463124	0.862	1	7	0.704496	0.734475	ko00310	Glyma.01G031500(ALDH2B7);Glyma.01G148700(ASHR2);Glyma.04G076300(At2g24580);Glyma.13G170600(ALDH2B7);Glyma.15G034400(ALDH3F1);Glyma.17G044300(LKR/SDH)	K00128+K11426+K00306+K00128+K00128+K14157	pme0026	C00047
